# Supplementary material
Source: ML conference proceedings conference paper supplement (https://openreview.net/forum?id=eOnQ2etkxto)
Supplement: supplementary_material [file attachment]

# Enabling Detailed Action Recognition Evaluation Through Video Dataset Augmentation: Supplementary Material

## 1 Ablation Study

### 1.1 Selection of Segmentation Model

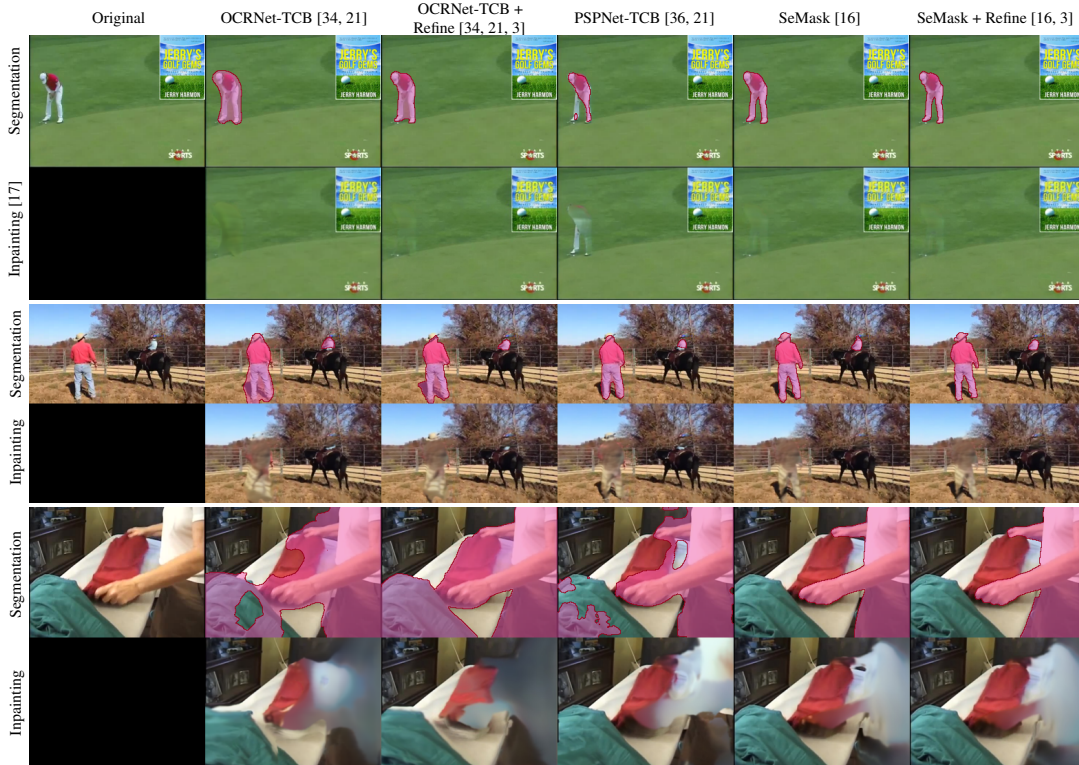

Figure 1: Segmentation results of different models. Check attached files for the video version of the figure.

While main contribution of our work is the toolkit framework, where segmentation model and the video inpainting model can be replaced to a better performing model, we show why we decided with the current choice for this paper. We qualitatively show the difference between segmentation models and how they perform differently in our toolkit. We have tested TCB [21]<sup>1</sup> using PSPNet [36] or OCRNet [34] as a backbone, and SeMask [16]. We have also tested using a segmentation refinement method [3]. Figure 1 shows some of the examples using different segmentation models and the inpainting results. TCB methods show inaccurate boundary, often times with larger segmentation than the actual human. While using segmentation refinement model [3] can help, but when if the initial segmentation is bad (e.g., the last row), segmentation refinement only gets the accurate boundary of the unrelated objects. SeMask [16] already shows a good boundary so the refinement does not help. Moreover, we see that SeMask has better temporal robustness, where we do not see large change of segmentation for different frames. For instance, we see that on the last row, first three segmentation

<sup>1</sup>We contacted the original authors for the trained weights.

models clearly show the brown pants of the person when inpainted, as that part of the segmentation has been missing in the neighbouring frames (See attached video for better understanding). We decide to use SeMask without any additional refinement.

## 1.2 Need of Video Inpainting Model

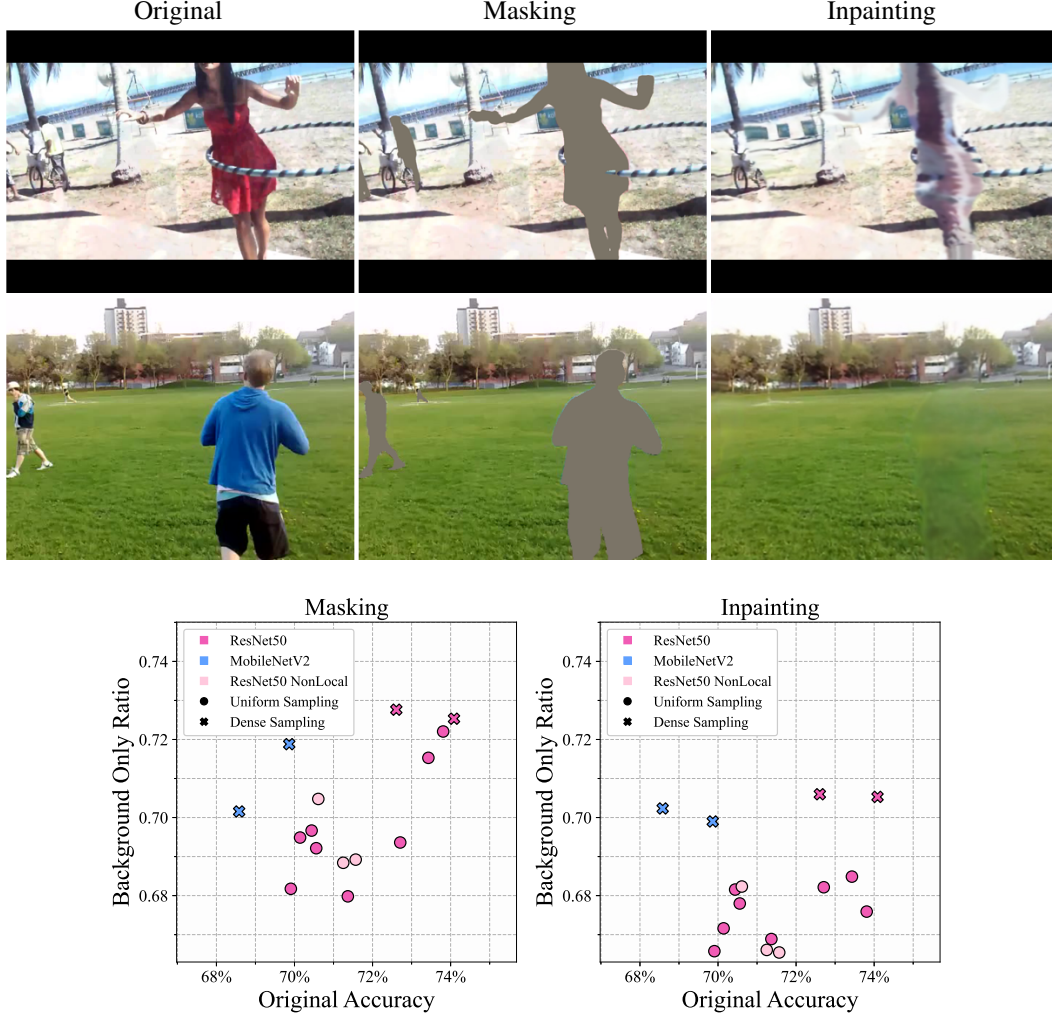

Figure 2: We compare Background Only Ratio using naïve masking and ViNet inpainting. **Top:** Example frames using masking and inpainting. **Bottom:** BOR of different methods on TSM [19]

Here, we compare the performance between TSM models using ViNet [17] or naïve inpainting method of filling the dataset average color. Figure 2 visualizes the method samples and the experiment results. Overall, using using masking shows higher background only accuracy. We expect this to be the model being able to see the shape of the human body in the masking method, thus the body information is not well obfuscated. This revisits the idea that the modern inpainting tool is crucial for evaluating human understanding of action recognition models. However, revealing of the body shape can be also seen in the inpainting method in some cases (e.g., top row of Figure 2). We believe having better inpainting model can resolve this, which we explain in Section 1.3.

## 1.3 Video Inpainting Model Comparisons

In this toolkit we used Deep Video Inpainting [17] for our inpainting module. However, a recent video inpainting module E2FGVI [18] was published in CVPR2022 and it shows better result than

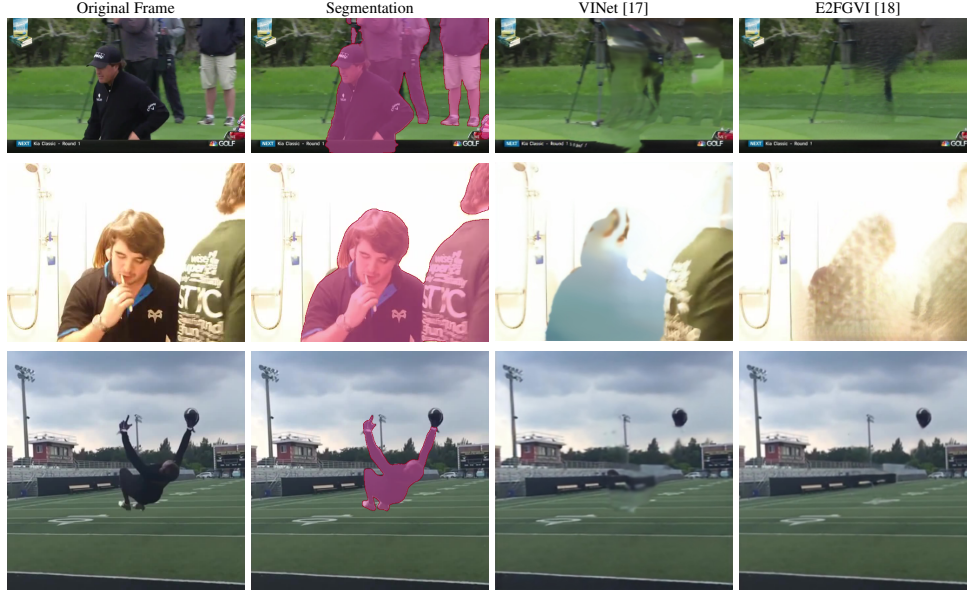

Figure 3: Inpainting results of ViNet and E2FGVI. Although E2FGVI is more accurate, the textural artifacts could have worse effect to classification models. Check attached files for the video version of the figure.

our current inpainting module. We compare ViNet [17] and E2FGVI [18] on Figure 3. While E2FGVI shows ‘accurate’ results, for example showing accurate black border on the first row of Figure 3 or non-distorted background panel in the third row. However, on many cases, E2FGVI shows textural artifacts, e.g., texture on the first and the second example. In similar cases, ViNet tend to use inaccurate inpainting (e.g., grey blob) but the texture is more realistic. We believe such issues of E2FGVI can cause an issue as classification models tend to rely more on the textural information more than the shape information [12]. As the codes for E2FGVI were available recently, we did not have enough time to experiment with E2FGVI, and we plan to update our toolkit with more accurate video inpainting module in the future.

## 2 Additional Related Work

**Out-of-context** The context of an image refers to the relationship between the natural scenes and the object. It has been long known that the context is an important cue to the object recognition system [31, 35]. There is nothing intrinsically wrong of using contextual cues, as it has been known that human as well uses contextual information [22]. However, over-reliance [11] on the context can lead to inaccurate predictions on out-of-context objects [4]. This is mostly severe to machine learning systems where the model learns the context from the dataset distribution, which can be heavily biased due to its collection strategy.

Similarly, there is a well recognized belief that the deep-learning models tend to look at the background when predicting a human action. This is especially believed to be true for datasets that cover wide range of classes as in-the-wild videos, as the collected videos are heavily correlated with the scene and the background objects (e.g., videos of dribbling a basketball shows basketball hoop on the background). The belief is backed up by series of researches. [5, 24] have shown that the performance of a machine learning model when feeding a single frame shows very similar performance with the ones that are fed multiple frames in UCF101 [26] and ActivityNet [8]. Another study [15] shows that the performance of a model trained/tested with a video with a person masked out is on par with a model trained without any mask.

### 3 Additional Experiment

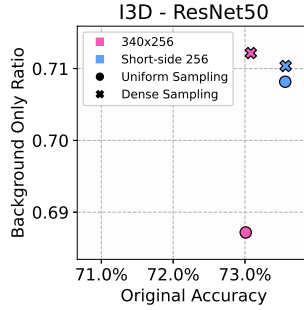

Figure 4: BOR on I3D

**Extension of Section 4.2.** Figure 3 shows effect of dense sampling strategy on I3D [2]. Colors show resolution used for training and testing. Similar to as TSM [19], dense sampling strategy shows that I3D models tend to rely lot more on video background. It also shows that the original accuracy cannot distinguish the difference between dense sampling strategy and uniform sampling strategy.

Table 1: SHAcc and SBErr per category. Human Action Category denotes the class label of the human action in the swapped video. Background Category denote the class label of the video where the background is from. **Top:** Categories with high SHAcc, **Bottom:** Categories with high SBErr.

| Human Action Category  |       |       | Background Category |       |       |
|------------------------|-------|-------|---------------------|-------|-------|
| Category               | SHAcc | SBErr | Category            | SHAcc | SBErr |
| belly dancing          | 75.36 | 14.49 | exercising arm      | 46.34 | 7.32  |
| carrying baby          | 74.67 | 17.33 | getting a tattoo    | 42.11 | 2.63  |
| capoeira               | 69.57 | 17.39 | answering questions | 40.62 | 0.00  |
| riding mule            | 0.00  | 75.00 | playing chess       | 4.65  | 93.02 |
| bouncing on trampoline | 0.00  | 60.00 | cutting pineapple   | 2.38  | 90.48 |
| scuba diving           | 5.56  | 52.78 | parasailing         | 2.04  | 79.59 |

**Category-wise Accuracy.** To understand how a human action recognizer performs on different categories of Action Swap Dataset, we break down the performance into each category. Here, we chose SlowFast [10] with ResNet50 [14] as the recognizer and Random Swap for the swap type.

Table 1 tabulates Human Action/Background categories and their SHAcc and SBErr. On the left, we tabulate the Human Action category, e.g., Among the swapped video where the human is from the class belly dancing, 75.36% of such videos, the model predict belly dancing, while 14.49% of videos were predicted the background. Similarly we tabulate analysis using background category on the right.

The model tends to predict the class of the action when the action only involves the human body and is often performed in various backgrounds. Meanwhile, actions that use specific objects (riding mule) or happen in a specific background (scuba diving) can not be well recognized by the model after the random swap. In such actions, models turn to predict from the background instead.

As for background categories, when the action does not have a specific background (e.g., exercising arm often happens under diverse settings in Kinetics-400), the model can predict using the pasted human body relatively well. On the other hand, if the action uses a very specific object (e.g., pineapple), has a distinctive object in the background (chessboard), or happens in a specific background (sky), the model leans towards using the background for its prediction.

#### 3.1 Analysing Human-Only Videos

Table 2 tabulates the result from using human-only videos.

Table 2: Experiments over Human Only Videos. HAcc denotes accuracy on Human Only Videos. Check supplementary material for the full experiment results.

| Model                       | Backbone     | Pre-trained      | OAcc (%)     | HAcc (%)     | $\frac{\text{HAcc}}{\text{OAcc}}$ |
|-----------------------------|--------------|------------------|--------------|--------------|-----------------------------------|
| <i>Normal-scale dataset</i> |              |                  |              |              |                                   |
| TSM [19]                    | MNetV2 [23]  | ImageNet         | 69.87        | 20.27        | 0.2902                            |
| R(2+1)D [27]                | ResNet34     | -                | 74.22        | 20.95        | 0.2822                            |
| TSN [29]                    | ResNet50     | ImageNet         | 71.75        | 17.92        | 0.2498                            |
| TIN [25]                    | ResNet50     | TSM-Kinetics400  | 70.89        | 20.40        | 0.2877                            |
| TSM [19]                    | ResNet50     | ImageNet         | 74.09        | 24.25        | 0.3273                            |
| I3D [2]                     | ResNet50     | ImageNet         | 73.57        | 23.89        | 0.3247                            |
| NL-TSM [30]                 | ResNet50     | ImageNet         | 71.57        | 19.75        | 0.2759                            |
| NL-I3D [30]                 | ResNet50     | ImageNet         | 74.91        | 19.42        | 0.2592                            |
| NL-SlowOnly [30]            | ResNet50     | ImageNet         | 75.78        | 17.99        | 0.2374                            |
| CSN [28]                    | ResNet50     | -                | 73.22        | 24.91        | 0.3403                            |
| TPN [33]                    | ResNet50     | ImageNet         | 76.16        | 25.26        | 0.3316                            |
| SlowOnly [10]               | ResNet50     | ImageNet         | 75.35        | 22.30        | 0.2959                            |
| SlowFast [10]               | ResNet50     | -                | 76.61        | 25.23        | 0.3294                            |
| SlowOnly [10]               | ResNet101    | -                | 76.26        | 26.90        | 0.3528                            |
| SlowFast [10]               | ResNet101+50 | -                | 76.55        | 24.23        | 0.3166                            |
| SlowFast [10]               | ResNet101    | -                | <b>78.10</b> | 26.90        | 0.3445                            |
| CSN [28]                    | ResNet152    | -                | 77.62        | <b>28.33</b> | <b>0.3650</b>                     |
| SlowFast [10]               | ResNet152+50 | -                | 77.24        | 27.20        | 0.3521                            |
| X3D [9]                     | X3D_S        | -                | 72.67        | 19.90        | 0.2738                            |
| X3D [9]                     | X3D_M        | -                | 75.55        | 22.27        | 0.2948                            |
| TANet [20]                  | TANet        | ImageNet         | 76.10        | 23.64        | 0.3107                            |
| <i>Large-scale dataset</i>  |              |                  |              |              |                                   |
| TSN [29]                    | ResNet50     | IG-1B [32]       | 70.96        | 15.84        | 0.2232                            |
| Omni-TSN [7]                | ResNet50     | IG-1B [32]       | 74.70        | 20.38        | 0.2728                            |
| Omni-SlowOnly [7]           | ResNet50     | -                | 76.49        | 25.18        | 0.3292                            |
| CSN [28]                    | ResNet50     | IG65M [13]       | 79.09        | 29.48        | 0.3727                            |
| Omni-SlowOnly [7]           | ResNet101    | -                | 80.00        | 31.81        | 0.3976                            |
| CSN [28]                    | ResNet152    | IG65M [13]       | <b>82.38</b> | <b>33.58</b> | <b>0.4076</b>                     |
| TimeSFormer [1]             | TimeSformer  | ImageNet-21K [6] | 77.97        | 22.27        | 0.2856                            |

## 4 Qualitative Results on Random Action Swap

## 5 Experiments on UCF101 dataset

Here, we show the toolkit used on top of the UCF101 [26] dataset. Figure 6 visualizes example frames of modified UCF101.

### 5.1 Results

Table 3: Background Only Video and Human Only Video results on UCF101.  $C \times S \times N$  denotes Clip Length  $\times$  Stride  $\times$  Number of Clips.

| # | Type     | Backbone | Pre-trained  | $C \times S \times N$ | OAcc  | BAcc  | BOR    | HAcc  | HOR    | Model Details |    |
|---|----------|----------|--------------|-----------------------|-------|-------|--------|-------|--------|---------------|----|
| 1 | TSN      | ResNet50 | ImageNet     | 1x1x3                 | 81.31 | 64.34 | 0.7913 | 10.84 | 0.1333 | ckpt          | py |
| 2 | SlowOnly | ResNet50 | Kinetics-400 | 8x4x1                 | 92.60 | 70.74 | 0.7639 | 36.11 | 0.3900 | ckpt          | py |
| 3 | SlowOnly | ResNet50 | ImageNet     | 8x4x1                 | 71.08 | 54.06 | 0.7605 | 13.27 | 0.1867 | ckpt          | py |
| 4 | C3D*     | C3D      | Sports1M     | 16x1x1                | 73.83 | 49.33 | 0.6681 | 16.15 | 0.2188 | ckpt          | py |
| 5 | TSM      | ResNet50 | Kinetics-400 | 1x1x16                | 94.32 | 70.53 | 0.7478 | 41.85 | 0.4437 | ckpt          | py |
| 6 | TSM      | ResNet50 | Kinetics-400 | 1x1x8                 | 94.16 | 69.92 | 0.7426 | 38.59 | 0.4099 | ckpt          | py |

\*: We were not able to get the reported accuracy of C3D. This is a known issue in MMAAction2 implementation of C3D.

### 5.2 Discussion

The results show similar conclusion as what we see from the modified Kinetics-400. Notable discovery is that TSM show high SHAcc on Table 4, higher than SBErr. We see this to be coming



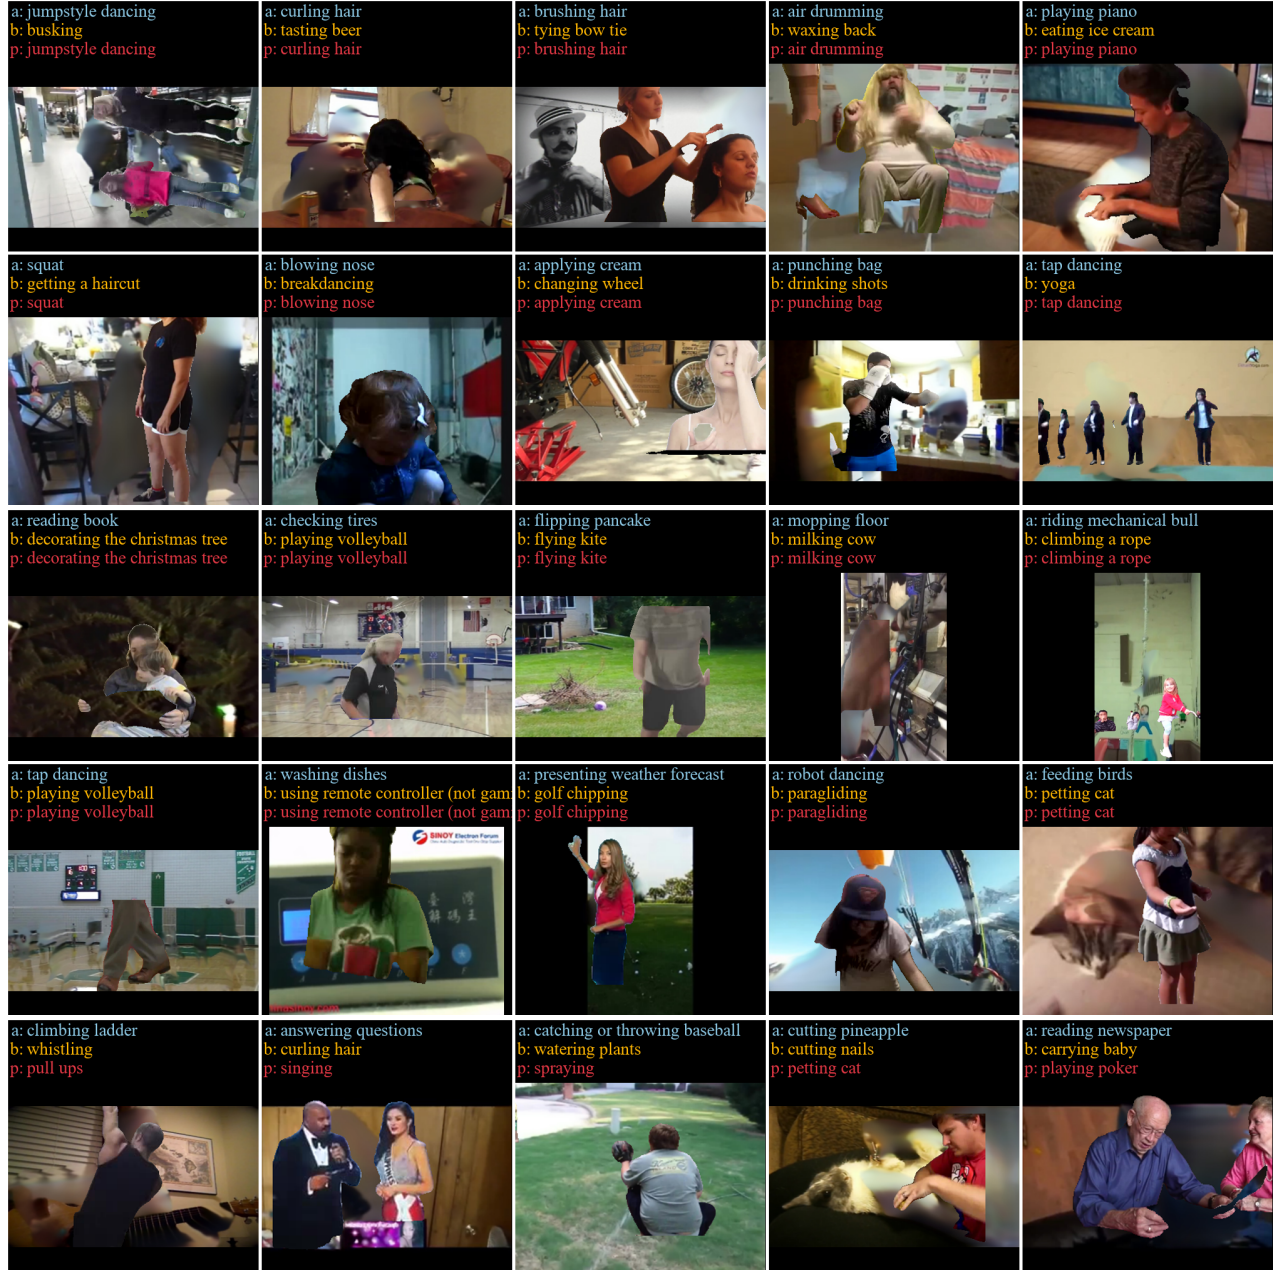

Figure 5: Random Swap Qualitative Results on ip-CSN [28]. a,b, and p denote action category, background category and prediction, respectively. Row 1-2: Samples where the prediction matches the action. Row 3-4: Samples where the prediction matches the background. Row 5: Prediction does not match any.

from Kinetics-400 pre-training, i.e., a model pre-trained with Kinetics-400 is heavily benefiting the downstream task of the smaller dataset. This can be seen from comparing #2 and #3 where a model pre-trained with Kinetics-400 is showing far superior performance than the same model pre-trained with ImageNet, under both original accuracy or the metrics we introduced.

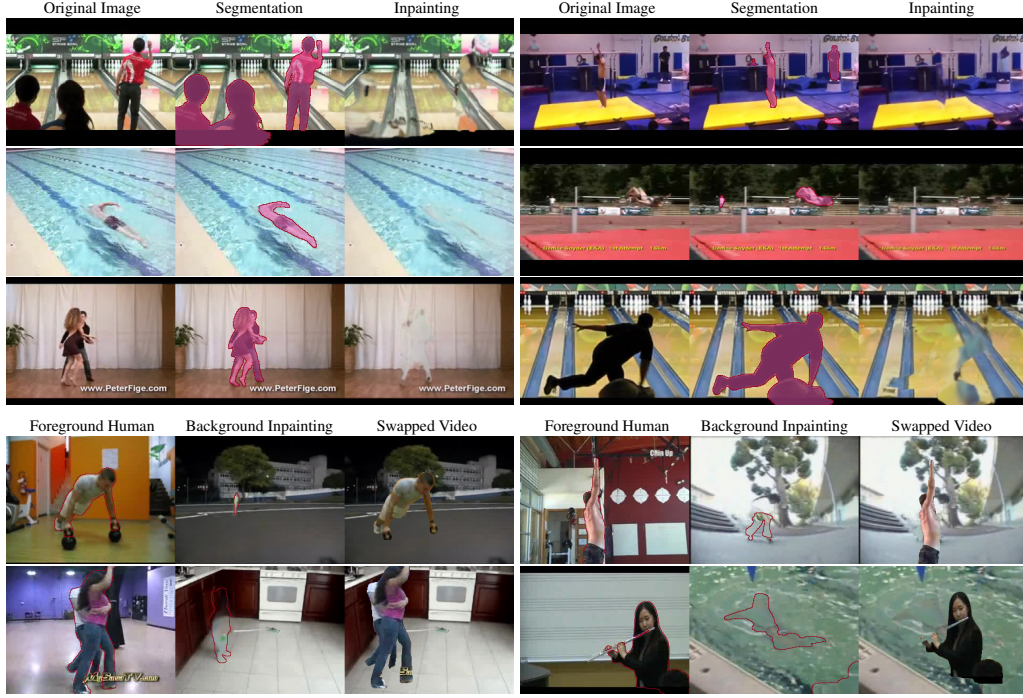

Figure 6: Human-centric Action Analysis on UCF101. First three rows show segmentation and inpainting results. The last two rows show Action Swap videos on UCF101. We draw human segmentation boundary for visibility.

Table 4: Action Swap Video results on UCF101. The numbers are averaged from 3 different random seeds.

| # | Type     | Backbone | Pre-trained  | $C \times S \times N$ | Random Swap      |                  | Close Swap       |                  | Far Swap         |                  | Same Swap<br>SHAcc | Model Details |
|---|----------|----------|--------------|-----------------------|------------------|------------------|------------------|------------------|------------------|------------------|--------------------|---------------|
|   |          |          |              |                       | SHAcc            | SBErr            | SHAcc            | SBErr            | SHAcc            | SBErr            |                    |               |
| 1 | TSN      | ResNet50 | ImageNet     | 1x1x3                 | 13.12 $\pm$ 0.27 | 31.88 $\pm$ 1.42 | 21.53 $\pm$ 0.4  | 31.54 $\pm$ 0.32 | 9.82 $\pm$ 0.73  | 33.06 $\pm$ 0.71 | 67.93 $\pm$ 0.53   | ckpt py       |
| 2 | SlowOnly | ResNet50 | Kinetics-400 | 8x4x1                 | 33.71 $\pm$ 0.59 | 39.22 $\pm$ 0.65 | 45.91 $\pm$ 0.83 | 32.86 $\pm$ 1.24 | 26.96 $\pm$ 0.43 | 47.52 $\pm$ 0.26 | 90.91 $\pm$ 0.29   | ckpt py       |
| 3 | SlowOnly | ResNet50 | ImageNet     | 8x4x1                 | 9.74 $\pm$ 0.25  | 35.28 $\pm$ 1.04 | 16.37 $\pm$ 0.89 | 29.12 $\pm$ 0.31 | 7.34 $\pm$ 0.06  | 43.03 $\pm$ 0.88 | 59.43 $\pm$ 1.21   | ckpt py       |
| 4 | C3D      | C3D      | Sports1M     | 16x1x1                | 10.61 $\pm$ 0.19 | 22.22 $\pm$ 0.39 | 17.73 $\pm$ 0.27 | 21.27 $\pm$ 0.24 | 8.34 $\pm$ 0.14  | 26.76 $\pm$ 1.82 | 53.42 $\pm$ 0.26   | ckpt py       |
| 5 | TSM      | ResNet50 | Kinetics-400 | 1x1x16                | 40.42 $\pm$ 0.55 | 26.84 $\pm$ 1.33 | 49.11 $\pm$ 0.71 | 26.51 $\pm$ 0.58 | 36.07 $\pm$ 0.89 | 32.15 $\pm$ 1.16 | 89.87 $\pm$ 0.42   | ckpt py       |
| 6 | TSM      | ResNet50 | Kinetics-400 | 1x1x8                 | 39.81 $\pm$ 1.11 | 26.43 $\pm$ 1.18 | 49.21 $\pm$ 1.16 | 25.88 $\pm$ 0.53 | 36.52 $\pm$ 0.68 | 29.67 $\pm$ 0.9  | 88.88 $\pm$ 0.53   | ckpt py       |

## 6 Downloads

We have uploaded the modified Kinetics-400 on Google Drive<sup>2</sup>. The link offers extracted frames of original Kinetics-400, segmentation mask, and inpainted version. As we draw Action Swap online, we did not upload any files for such. Instead, we offer visualizing code of Action Swap and action swap pair separately.

## 7 Details of the models we tested

We detail all 74 models we trained on Table 5. Since every model has some specific configurations, we cannot list every detail in this paper. We list only some of the characteristics we used in the paper. Rows that look like a duplicate have unlisted features that differentiate each other. E.g., #16 is trained for 50 epochs and #17 is trained for 100 epochs. #62 - #64 is three different implementations of TimeSFormer [1] listed in the original paper. The details of the settings of each row can be viewed by clicking the ‘config’ link.

<sup>2</sup><https://drive.google.com/drive/folders/1IiLGMykqUjQp0IFHB-Yl7Hk1Yzzswrgx?usp=sharing>

## 8 Full experiment

Here we list the all the experiment in the main paper. The order of the models we tested are the same as Table 5.

**Background Only Videos** Table 6 tabulates full experiment results for Background Only Videos.

**Human Only Videos** Table 7 tabulates full experiment results for Human Only Videos.

**Action Swap Videos** Table 8 tabulates full experiment results for Action Swap Videos.

## 9 Details of Action-Swap

Here, we detail the method of our action-swap. Note that our method is only dependent on videos, but not on sampling strategy or image resizing pre-process.

**Temporal Alignment** As two videos can have different length when performing action-swap, for the generated video, we follow the length of the foreground action. For each of the action frames, corresponding new background is taken from the same relative temporal position. For example, assume the foreground action video has 100 frames, and the background video has 200 frames. The resulting action-swap video will take frame index of:

$[[0, 0], [1, 2], \dots, [\text{index of foreground video frames}, \text{index of background video frames}, \dots, [99, 198]]]$

Please check [https://github.com/princetonvisualai/HAT/blob/main/mmaction2/mmaction/datasets/actionswap\\_dataset.py#L258](https://github.com/princetonvisualai/HAT/blob/main/mmaction2/mmaction/datasets/actionswap_dataset.py#L258) for the code implementation.

**Spatial Alignment** When merging foreground and background when given two frames, we first use the original resolution for both frames. As both frames can have different resolution, we follow the resolution of the background. We use inpainted background frame as the base, and paste the foreground action on top of the background. For the first frame of the Action-Swap, we perform paste so that the foreground and the background has the same weight-center of the human segmentation. We keep this alignment and use the same alignment for the rest of the frames. This is done to keep the human body movement relative to the camera window. E.g., if a person moves from left to right in the camera window in the original video, we want to keep the same movement when the background is swapped.



Table 5: Details of all the models we have tested.

| #  | Dataset      | Model Structure | Backbone             | Pre-trained     | Resolution      | Dense Sampling | Clip Length | Stride | Number of Clips | Trained Weights | Config |
|----|--------------|-----------------|----------------------|-----------------|-----------------|----------------|-------------|--------|-----------------|-----------------|--------|
| 1  | Normal Scale | TSN             | ResNet50             | ImageNet        | 340x256         | Uniform        | 1           | 1      | 3               | ckpt            | config |
| 2  |              |                 | ResNet50             | ImageNet        | short-side 256  | Uniform        | 1           | 1      | 3               | ckpt            | config |
| 3  |              |                 | ResNet50             | ImageNet        | 340x256         | Dense          | 1           | 1      | 5               | ckpt            | config |
| 4  |              |                 | ResNet50             | ImageNet        | short-side 320  | Uniform        | 1           | 1      | 3               | ckpt            | config |
| 5  |              |                 | ResNet50             | ImageNet        | short-side 256  | Uniform        | 1           | 1      | 8               | ckpt            | config |
| 6  |              |                 | ResNet50             | ImageNet        | short-side 320  | Uniform        | 1           | 1      | 8               | ckpt            | config |
| 7  |              |                 | ResNet50             | ImageNet        | 340x256         | Dense          | 1           | 1      | 8               | ckpt            | config |
| 8  | R(2+1)D      |                 | ResNet34             | None            | short-side 256  | Uniform        | 8           | 8      | 1               | ckpt            | config |
| 9  |              |                 | ResNet34             | None            | short-side 320  | Uniform        | 8           | 8      | 1               | ckpt            | config |
| 10 |              |                 | ResNet34             | None            | short-side 320  | Uniform        | 32          | 2      | 1               | ckpt            | config |
| 11 | TIN          |                 | ResNet50             | TSM-Kinetics400 | short-side 256  | Uniform        | 1           | 1      | 8               | ckpt            | config |
| 12 | TSM          |                 | MobileNetV2          | ImageNet        | short-side 320  | Dense          | 1           | 1      | 8               | ckpt            | config |
| 13 |              |                 | MobileNetV2          | ImageNet        | short-side 320  | Dense          | 1           | 1      | 8               | ckpt            | config |
| 14 | I3D          |                 | ResNet50             | ImageNet        | 340x256         | Uniform        | 1           | 1      | 8               | ckpt            | config |
| 15 |              |                 | ResNet50             | ImageNet        | short-side 256  | Uniform        | 1           | 1      | 8               | ckpt            | config |
| 16 |              |                 | ResNet50             | ImageNet        | short-side 320  | Uniform        | 1           | 1      | 8               | ckpt            | config |
| 17 |              |                 | ResNet50             | ImageNet        | short-side 320  | Uniform        | 1           | 1      | 8               | ckpt            | config |
| 18 |              |                 | ResNet50             | ImageNet        | short-side 256  | Uniform        | 1           | 1      | 8               | ckpt            | config |
| 19 |              |                 | ResNet50             | ImageNet        | short-side 320  | Dense          | 1           | 1      | 8               | ckpt            | config |
| 20 |              |                 | ResNet50             | ImageNet        | short-side 320  | Dense          | 1           | 1      | 8               | ckpt            | config |
| 21 |              |                 | ResNet50             | ImageNet        | 340x256         | Uniform        | 1           | 1      | 16              | ckpt            | config |
| 22 |              |                 | ResNet50             | ImageNet        | short-side 256  | Uniform        | 1           | 1      | 16              | ckpt            | config |
| 23 |              |                 | ResNet50             | ImageNet        | short-side 320  | Uniform        | 1           | 1      | 16              | ckpt            | config |
| 24 |              |                 | ResNet50             | ImageNet        | 340x256         | Uniform        | 32          | 2      | 1               | ckpt            | config |
| 25 |              |                 | ResNet50             | ImageNet        | short-side 256  | Uniform        | 32          | 2      | 1               | ckpt            | config |
| 26 |              |                 | ResNet50             | ImageNet        | 340x256         | Dense          | 32          | 2      | 1               | ckpt            | config |
| 27 | NL-TSM       |                 | ResNet50             | ImageNet        | short-side 256  | Dense          | 32          | 2      | 1               | ckpt            | config |
| 28 |              |                 | ResNet50             | ImageNet        | short-side 320  | Uniform        | 1           | 1      | 8               | ckpt            | config |
| 29 |              |                 | ResNet50             | ImageNet        | short-side 320  | Uniform        | 1           | 1      | 8               | ckpt            | config |
| 30 | NL-I3D       |                 | ResNet50             | ImageNet        | short-side 320  | Uniform        | 1           | 1      | 8               | ckpt            | config |
| 31 |              |                 | ResNet50             | ImageNet        | short-side 256p | Uniform        | 32          | 2      | 1               | ckpt            | config |
| 32 |              |                 | ResNet50             | ImageNet        | short-side 256p | Uniform        | 32          | 2      | 1               | ckpt            | config |
| 33 | NL-SlowOnly  |                 | ResNet50             | ImageNet        | short-side 256p | Uniform        | 32          | 2      | 1               | ckpt            | config |
| 34 |              |                 | ResNet50             | ImageNet        | short-side 320  | Uniform        | 4           | 16     | 1               | ckpt            | config |
| 35 |              |                 | ResNet50             | ImageNet        | short-side 320  | Uniform        | 8           | 8      | 1               | ckpt            | config |
| 36 | CSN          |                 | ResNet50             | None            | short-side 320  | Uniform        | 32          | 2      | 1               | ckpt            | config |
| 37 |              |                 | ResNet152            | None            | short-side 320  | Uniform        | 32          | 2      | 1               | ckpt            | config |
| 38 | TPN          |                 | ResNet152            | None            | short-side 320  | Uniform        | 32          | 2      | 1               | ckpt            | config |
| 39 |              |                 | ResNet50             | None            | short-side 320  | Uniform        | 8           | 8      | 1               | ckpt            | config |
| 40 |              |                 | ResNet50             | ImageNet        | short-side 320  | Uniform        | 8           | 8      | 1               | ckpt            | config |
| 41 | X3D          |                 | X3D_S                | None            | short-side 320  | Uniform        | 13          | 6      | 1               | ckpt            | config |
| 42 |              |                 | X3D_M                | None            | short-side 320  | Uniform        | 16          | 5      | 1               | ckpt            | config |
| 43 | TANet        |                 | TANet                | ImageNet        | short-side 320  | Dense          | 1           | 1      | 8               | ckpt            | config |
| 44 | SlowOnly     |                 | ResNet50             | None            | short-side 256  | Uniform        | 4           | 16     | 1               | ckpt            | config |
| 45 |              |                 | ResNet50             | None            | short-side 256  | Uniform        | 8           | 8      | 1               | ckpt            | config |
| 46 | SlowFast     |                 | ResNet50             | None            | short-side 320  | Uniform        | 4           | 16     | 1               | ckpt            | config |
| 47 |              |                 | ResNet50             | None            | short-side 320  | Uniform        | 8           | 8      | 1               | ckpt            | config |
| 48 |              |                 | ResNet50             | ImageNet        | short-side 320  | Uniform        | 4           | 16     | 1               | ckpt            | config |
| 49 |              |                 | ResNet50             | ImageNet        | short-side 320  | Uniform        | 8           | 8      | 1               | ckpt            | config |
| 50 |              |                 | ResNet101            | None            | short-side 320  | Uniform        | 8           | 8      | 1               | ckpt            | config |
| 51 |              |                 | ResNet50             | None            | short-side 256  | Uniform        | 4           | 16     | 1               | ckpt            | config |
| 52 |              |                 | ResNet50             | None            | short-side 320  | Uniform        | 4           | 16     | 1               | ckpt            | config |
| 53 |              |                 | ResNet50             | None            | short-side 320  | Uniform        | 4           | 16     | 1               | ckpt            | config |
| 54 |              |                 | ResNet50             | None            | short-side 320  | Uniform        | 8           | 8      | 1               | ckpt            | config |
| 55 |              |                 | ResNet50             | None            | short-side 320  | Uniform        | 8           | 8      | 1               | ckpt            | config |
| 56 | Large Scale  |                 | ResNet50             | None            | short-side 320  | Uniform        | 8           | 8      | 1               | ckpt            | config |
| 57 |              |                 | ResNet50             | None            | short-side 320  | Uniform        | 8           | 8      | 1               | ckpt            | config |
| 58 |              |                 | ResNet101 + ResNet50 | None            | short-side 256  | Uniform        | 4           | 16     | 1               | ckpt            | config |
| 59 |              |                 | ResNet152 + ResNet50 | None            | short-side 256  | Uniform        | 4           | 16     | 1               | ckpt            | config |
| 60 |              |                 | ResNet101            | None            | short-side 256  | Uniform        | 8           | 8      | 1               | ckpt            | config |
| 61 |              |                 | ResNet50             | IG-1B           | short-side 320  | Uniform        | 1           | 1      | 3               | ckpt            | config |
| 62 |              |                 | TimeSformer          | ImageNet-21K    | short-side 320  | Uniform        | 8           | 32     | 1               | ckpt            | config |
| 63 |              |                 | TimeSformer          | ImageNet-21K    | short-side 320  | Uniform        | 8           | 32     | 1               | ckpt            | config |
| 64 |              |                 | TimeSformer          | ImageNet-21K    | short-side 320  | Uniform        | 8           | 32     | 1               | ckpt            | config |
| 65 |              |                 | ResNet50             | ImageNet        | 340x256         | Uniform        | 1           | 1      | 3               | ckpt            | config |
| 66 | Omni-TSN     |                 | ResNet50             | IG-1B           | short-side 320  | Uniform        | 1           | 1      | 3               | ckpt            | config |
| 67 |              |                 | ResNet50             | None            | short-side 320  | Uniform        | 4           | 16     | 1               | ckpt            | config |
| 68 |              |                 | ResNet101            | None            | short-side 320  | Uniform        | 8           | 8      | 1               | ckpt            | config |
| 69 | CSN          |                 | ResNet50             | IG65M           | short-side 320  | Uniform        | 32          | 2      | 1               | ckpt            | config |
| 70 |              |                 | ResNet152            | Sports1M        | short-side 320  | Uniform        | 32          | 2      | 1               | ckpt            | config |
| 71 |              |                 | ResNet152            | Sports1M        | short-side 320  | Uniform        | 32          | 2      | 1               | ckpt            | config |
| 72 |              |                 | ResNet152            | IG65M           | short-side 320  | Uniform        | 32          | 2      | 1               | ckpt            | config |
| 73 |              |                 | ResNet152            | IG65M           | short-side 320  | Uniform        | 32          | 2      | 1               | ckpt            | config |
| 74 |              |                 | ResNet152            | IG65M           | short-side 320  | Uniform        | 32          | 2      | 1               | ckpt            | config |

Table 6: Full experiment result for Background Only videos.

| #  | Dataset       | Model Structure | Backbone             | Pre-trained     | Sampling | Original Accuracy | Background Accuracy | Ratio  |
|----|---------------|-----------------|----------------------|-----------------|----------|-------------------|---------------------|--------|
| 1  | Normal Scale  | TSN             | ResNet50             | ImageNet        | Uniform  | 68.93             | 47.82               | 0.6937 |
| 2  |               |                 | ResNet50             | ImageNet        | Uniform  | 69.43             | 48.78               | 0.7025 |
| 3  |               |                 | ResNet50             | ImageNet        | Dense    | 68.37             | 46.72               | 0.6833 |
| 4  |               |                 | ResNet50             | ImageNet        | Uniform  | 70.06             | 48.43               | 0.6913 |
| 5  |               |                 | ResNet50             | ImageNet        | Uniform  | 71.12             | 48.00               | 0.6748 |
| 6  |               |                 | ResNet50             | ImageNet        | Uniform  | 71.75             | 49.02               | 0.6833 |
| 7  | R(2+1)D       |                 | ResNet50             | ImageNet        | Dense    | 68.98             | 46.81               | 0.6787 |
| 8  |               |                 | ResNet34             | None            | Uniform  | 67.35             | 48.20               | 0.7157 |
| 9  |               |                 | ResNet34             | None            | Uniform  | 69.13             | 49.36               | 0.7140 |
| 10 |               |                 | ResNet34             | None            | Uniform  | 74.22             | 52.99               | 0.7140 |
| 11 | TIN           | TSM             | ResNet50             | TSM-Kinetics400 | Uniform  | 70.89             | 48.32               | 0.6816 |
| 12 |               |                 | MobileNetV2          | ImageNet        | Dense    | 68.58             | 48.17               | 0.7023 |
| 13 |               |                 | MobileNetV2          | ImageNet        | Dense    | 69.87             | 48.84               | 0.6990 |
| 14 |               |                 | ResNet50             | ImageNet        | Uniform  | 69.91             | 46.54               | 0.6658 |
| 15 |               |                 | ResNet50             | ImageNet        | Uniform  | 70.56             | 47.84               | 0.6780 |
| 16 |               |                 | ResNet50             | ImageNet        | Uniform  | 70.14             | 47.11               | 0.6716 |
| 17 |               |                 | ResNet50             | ImageNet        | Uniform  | 71.37             | 47.74               | 0.6689 |
| 18 |               |                 | ResNet50             | ImageNet        | Uniform  | 70.44             | 48.01               | 0.6816 |
| 19 |               |                 | ResNet50             | ImageNet        | Dense    | 72.61             | 51.26               | 0.7060 |
| 20 |               |                 | ResNet50             | ImageNet        | Dense    | 74.09             | 52.25               | 0.7053 |
| 21 |               |                 | ResNet50             | ImageNet        | Uniform  | 72.71             | 49.60               | 0.6821 |
| 22 |               |                 | ResNet50             | ImageNet        | Uniform  | 73.43             | 50.29               | 0.6849 |
| 23 | I3D           |                 | ResNet50             | ImageNet        | Uniform  | 73.81             | 49.89               | 0.6759 |
| 24 |               |                 | ResNet50             | ImageNet        | Uniform  | 73.01             | 50.17               | 0.6872 |
| 25 |               |                 | ResNet50             | ImageNet        | Uniform  | 73.56             | 52.09               | 0.7082 |
| 26 |               |                 | ResNet50             | ImageNet        | Dense    | 73.08             | 52.05               | 0.7122 |
| 27 | NL-TSM        |                 | ResNet50             | ImageNet        | Dense    | 73.57             | 52.26               | 0.7104 |
| 28 |               |                 | ResNet50             | ImageNet        | Uniform  | 71.57             | 47.62               | 0.6654 |
| 29 |               |                 | ResNet50             | ImageNet        | Uniform  | 70.61             | 48.18               | 0.6823 |
| 30 |               |                 | ResNet50             | ImageNet        | Uniform  | 71.25             | 47.46               | 0.6661 |
| 31 | NL-I3D        |                 | ResNet50             | ImageNet        | Uniform  | 74.91             | 52.84               | 0.7054 |
| 32 |               |                 | ResNet50             | ImageNet        | Uniform  | 73.60             | 52.35               | 0.7114 |
| 33 |               |                 | ResNet50             | ImageNet        | Uniform  | 74.00             | 52.96               | 0.7156 |
| 34 |               |                 | ResNet50             | ImageNet        | Uniform  | 74.52             | 53.17               | 0.7135 |
| 35 | NL-SlowOnly   |                 | ResNet50             | ImageNet        | Uniform  | 75.78             | 53.51               | 0.7062 |
| 36 |               |                 | ResNet50             | None            | Uniform  | 73.22             | 51.97               | 0.7098 |
| 37 | CSN           |                 | ResNet152            | None            | Uniform  | 76.30             | 53.70               | 0.7038 |
| 38 |               |                 | ResNet152            | None            | Uniform  | 77.62             | 54.33               | 0.6999 |
| 39 | TPN           |                 | ResNet50             | None            | Uniform  | 73.52             | 51.76               | 0.7040 |
| 40 |               |                 | ResNet50             | ImageNet        | Uniform  | 76.16             | 54.40               | 0.7143 |
| 41 | X3D           |                 | X3D_S                | None            | Uniform  | 72.67             | 50.61               | 0.6964 |
| 42 |               |                 | X3D_M                | None            | Uniform  | 75.55             | 52.47               | 0.6944 |
| 43 | TANet         |                 | TANet                | ImageNet        | Dense    | 76.10             | 53.71               | 0.7059 |
| 44 |               |                 | ResNet50             | None            | Uniform  | 72.79             | 51.67               | 0.7099 |
| 45 | SlowOnly      |                 | ResNet50             | None            | Uniform  | 74.60             | 53.15               | 0.7125 |
| 46 |               |                 | ResNet50             | None            | Uniform  | 72.72             | 51.60               | 0.7096 |
| 47 |               |                 | ResNet50             | None            | Uniform  | 72.55             | 50.82               | 0.7004 |
| 48 |               |                 | ResNet50             | ImageNet        | Uniform  | 73.33             | 52.58               | 0.7171 |
| 49 |               |                 | ResNet50             | ImageNet        | Uniform  | 75.35             | 53.97               | 0.7163 |
| 50 |               |                 | ResNet101            | None            | Uniform  | 76.26             | 54.38               | 0.7131 |
| 51 |               |                 | ResNet50             | None            | Uniform  | 74.78             | 53.13               | 0.7105 |
| 52 |               |                 | ResNet50             | None            | Uniform  | 75.81             | 53.33               | 0.7035 |
| 53 |               |                 | ResNet50             | None            | Uniform  | 76.02             | 54.26               | 0.7138 |
| 54 |               |                 | ResNet50             | None            | Uniform  | 76.61             | 53.46               | 0.6978 |
| 55 | SlowFast      |                 | ResNet50             | None            | Uniform  | 76.19             | 53.44               | 0.7014 |
| 56 |               |                 | ResNet50             | None            | Uniform  | 75.56             | 53.77               | 0.7116 |
| 57 |               |                 | ResNet50             | None            | Uniform  | 76.46             | 54.21               | 0.7090 |
| 58 |               |                 | ResNet101 + ResNet50 | None            | Uniform  | 76.55             | 55.19               | 0.7210 |
| 59 |               |                 | ResNet152 + ResNet50 | None            | Uniform  | 77.24             | 55.46               | 0.7179 |
| 60 |               |                 | ResNet101            | None            | Uniform  | 78.10             | 56.14               | 0.7189 |
| 61 |               |                 | ResNet50             | IG-1B           | Uniform  | 70.96             | 49.05               | 0.6912 |
| 62 |               |                 | TimeSformer          | ImageNet-21K    | Uniform  | 77.97             | 53.88               | 0.6910 |
| 63 |               |                 | TimeSformer          | ImageNet-21K    | Uniform  | 76.97             | 54.25               | 0.7047 |
| 64 |               |                 | TimeSformer          | ImageNet-21K    | Uniform  | 76.85             | 52.06               | 0.6774 |
| 65 | Omni-TSN      |                 | ResNet50             | ImageNet        | Uniform  | 72.45             | 50.98               | 0.7037 |
| 66 |               |                 | ResNet50             | IG-1B           | Uniform  | 74.70             | 52.09               | 0.6973 |
| 67 | Omni-SlowOnly |                 | ResNet50             | None            | Uniform  | 76.49             | 55.00               | 0.7190 |
| 68 |               |                 | ResNet101            | None            | Uniform  | 80.00             | 58.05               | 0.7255 |
| 69 | CSN           |                 | ResNet50             | IG65M           | Uniform  | 79.09             | 55.83               | 0.7059 |
| 70 |               |                 | ResNet152            | Sports1M        | Uniform  | 78.12             | 55.78               | 0.7140 |
| 71 |               |                 | ResNet152            | Sports1M        | Uniform  | 78.34             | 55.07               | 0.7030 |
| 72 |               |                 | ResNet152            | IG65M           | Uniform  | 82.20             | 59.22               | 0.7204 |
| 73 |               |                 | ResNet152            | IG65M           | Uniform  | 82.38             | 58.97               | 0.7159 |
| 74 |               |                 | ResNet152            | IG65M           | Uniform  | 80.39             | 59.35               | 0.7382 |

Table 7: Full experiment result for Human Only videos.

| #  | Dataset       | Model Structure | Backbone             | Pre-trained     | Sampling | Original Accuracy | Human Accuracy | Ratio  |
|----|---------------|-----------------|----------------------|-----------------|----------|-------------------|----------------|--------|
| 1  | Normal Scale  | TSN             | ResNet50             | ImageNet        | Uniform  | 68.93             | 13.69          | 0.1986 |
| 2  |               |                 | ResNet50             | ImageNet        | Uniform  | 69.43             | 12.29          | 0.1769 |
| 3  |               |                 | ResNet50             | ImageNet        | Dense    | 68.37             | 15.85          | 0.2318 |
| 4  |               |                 | ResNet50             | ImageNet        | Uniform  | 70.06             | 15.71          | 0.2242 |
| 5  |               |                 | ResNet50             | ImageNet        | Uniform  | 71.12             | 16.71          | 0.2349 |
| 6  |               |                 | ResNet50             | ImageNet        | Uniform  | 71.75             | 17.92          | 0.2498 |
| 7  | R(2+1)D       |                 | ResNet50             | ImageNet        | Dense    | 68.98             | 16.89          | 0.2448 |
| 8  |               |                 | ResNet34             | None            | Uniform  | 67.35             | 18.85          | 0.2798 |
| 9  |               |                 | ResNet34             | None            | Uniform  | 69.13             | 15.87          | 0.2296 |
| 10 |               |                 | ResNet34             | None            | Uniform  | 74.22             | 20.95          | 0.2822 |
| 11 | TIN           | TSM             | ResNet50             | TSM-Kinetics400 | Uniform  | 70.89             | 20.40          | 0.2877 |
| 12 |               |                 | MobileNetV2          | ImageNet        | Dense    | 68.58             | 19.23          | 0.2803 |
| 13 | I3D           |                 | MobileNetV2          | ImageNet        | Dense    | 69.87             | 20.27          | 0.2902 |
| 14 |               |                 | ResNet50             | ImageNet        | Uniform  | 69.91             | 19.49          | 0.2788 |
| 15 |               |                 | ResNet50             | ImageNet        | Uniform  | 70.56             | 20.05          | 0.2841 |
| 16 |               |                 | ResNet50             | ImageNet        | Uniform  | 70.14             | 20.48          | 0.2920 |
| 17 |               |                 | ResNet50             | ImageNet        | Uniform  | 71.37             | 20.67          | 0.2896 |
| 18 |               |                 | ResNet50             | ImageNet        | Uniform  | 70.44             | 19.85          | 0.2819 |
| 19 |               |                 | ResNet50             | ImageNet        | Dense    | 72.61             | 22.53          | 0.3102 |
| 20 |               |                 | ResNet50             | ImageNet        | Dense    | 74.09             | 24.25          | 0.3273 |
| 21 |               |                 | ResNet50             | ImageNet        | Uniform  | 72.71             | 22.34          | 0.3072 |
| 22 |               |                 | ResNet50             | ImageNet        | Uniform  | 73.43             | 22.72          | 0.3094 |
| 23 |               |                 | ResNet50             | ImageNet        | Uniform  | 73.81             | 23.28          | 0.3154 |
| 24 |               |                 | ResNet50             | ImageNet        | Uniform  | 73.01             | 22.45          | 0.3075 |
| 25 |               |                 | ResNet50             | ImageNet        | Uniform  | 73.56             | 22.77          | 0.3096 |
| 26 | NL-TSM        |                 | ResNet50             | ImageNet        | Dense    | 73.08             | 23.70          | 0.3243 |
| 27 |               |                 | ResNet50             | ImageNet        | Dense    | 73.57             | 23.89          | 0.3247 |
| 28 |               |                 | ResNet50             | ImageNet        | Uniform  | 71.57             | 19.75          | 0.2759 |
| 29 |               |                 | ResNet50             | ImageNet        | Uniform  | 70.61             | 21.21          | 0.3004 |
| 30 | NL-I3D        |                 | ResNet50             | ImageNet        | Uniform  | 71.25             | 19.73          | 0.2769 |
| 31 |               |                 | ResNet50             | ImageNet        | Uniform  | 74.91             | 19.42          | 0.2592 |
| 32 | NL-SlowOnly   |                 | ResNet50             | ImageNet        | Uniform  | 73.60             | 23.80          | 0.3234 |
| 33 |               |                 | ResNet50             | ImageNet        | Uniform  | 74.00             | 20.04          | 0.2708 |
| 34 |               |                 | ResNet50             | ImageNet        | Uniform  | 74.52             | 19.20          | 0.2577 |
| 35 |               |                 | ResNet50             | ImageNet        | Uniform  | 75.78             | 17.99          | 0.2374 |
| 36 | CSN           |                 | ResNet50             | None            | Uniform  | 73.22             | 24.91          | 0.3403 |
| 37 |               |                 | ResNet152            | None            | Uniform  | 76.30             | 27.20          | 0.3564 |
| 38 | TPN           |                 | ResNet152            | None            | Uniform  | 77.62             | 28.33          | 0.3650 |
| 39 |               |                 | ResNet50             | None            | Uniform  | 73.52             | 26.40          | 0.3591 |
| 40 |               |                 | ResNet50             | ImageNet        | Uniform  | 76.16             | 25.26          | 0.3316 |
| 41 |               |                 | X3D_S                | None            | Uniform  | 72.67             | 19.90          | 0.2738 |
| 42 | TANet         |                 | X3D_M                | None            | Uniform  | 75.55             | 22.27          | 0.2948 |
| 43 |               |                 | TANet                | ImageNet        | Dense    | 76.10             | 23.64          | 0.3107 |
| 44 | SlowOnly      |                 | ResNet50             | None            | Uniform  | 72.79             | 20.12          | 0.2764 |
| 45 |               |                 | ResNet50             | None            | Uniform  | 74.60             | 22.08          | 0.2959 |
| 46 |               |                 | ResNet50             | None            | Uniform  | 72.72             | 20.53          | 0.2824 |
| 47 |               |                 | ResNet50             | None            | Uniform  | 72.55             | 19.50          | 0.2688 |
| 48 | SlowFast      |                 | ResNet50             | ImageNet        | Uniform  | 73.33             | 20.39          | 0.2781 |
| 49 |               |                 | ResNet50             | ImageNet        | Uniform  | 75.35             | 22.30          | 0.2959 |
| 50 |               |                 | ResNet101            | None            | Uniform  | 76.26             | 26.90          | 0.3528 |
| 51 |               |                 | ResNet50             | None            | Uniform  | 74.78             | 22.90          | 0.3063 |
| 52 |               |                 | ResNet50             | None            | Uniform  | 75.81             | 26.08          | 0.3440 |
| 53 |               |                 | ResNet50             | None            | Uniform  | 76.02             | 24.07          | 0.3166 |
| 54 |               |                 | ResNet50             | None            | Uniform  | 76.61             | 25.23          | 0.3294 |
| 55 |               |                 | ResNet50             | None            | Uniform  | 76.19             | 25.00          | 0.3281 |
| 56 |               |                 | ResNet50             | None            | Uniform  | 75.56             | 22.96          | 0.3038 |
| 57 |               |                 | ResNet50             | None            | Uniform  | 76.46             | 25.17          | 0.3293 |
| 58 |               |                 | ResNet101 + ResNet50 | None            | Uniform  | 76.55             | 24.23          | 0.3166 |
| 59 |               |                 | ResNet152 + ResNet50 | None            | Uniform  | 77.24             | 27.20          | 0.3521 |
| 60 | Large Scale   | TSN             | ResNet101            | None            | Uniform  | 78.10             | 26.90          | 0.3445 |
| 61 |               |                 | ResNet50             | IG-1B           | Uniform  | 70.96             | 15.84          | 0.2232 |
| 62 |               |                 | TimeSformer          | ImageNet-21K    | Uniform  | 77.97             | 22.27          | 0.2856 |
| 63 |               |                 | TimeSformer          | ImageNet-21K    | Uniform  | 76.97             | 22.70          | 0.2950 |
| 64 | Omni-TSN      |                 | TimeSformer          | ImageNet-21K    | Uniform  | 76.85             | 21.11          | 0.2746 |
| 65 |               |                 | ResNet50             | ImageNet        | Uniform  | 72.45             | 16.50          | 0.2278 |
| 66 |               |                 | ResNet50             | IG-1B           | Uniform  | 74.70             | 20.38          | 0.2728 |
| 67 |               |                 | ResNet50             | None            | Uniform  | 76.49             | 25.18          | 0.3292 |
| 68 | Omni-SlowOnly |                 | ResNet101            | None            | Uniform  | 80.00             | 31.81          | 0.3976 |
| 69 |               |                 | ResNet50             | IG65M           | Uniform  | 79.09             | 29.48          | 0.3727 |
| 70 |               |                 | ResNet152            | Sports1M        | Uniform  | 78.12             | 27.17          | 0.3478 |
| 71 |               |                 | ResNet152            | Sports1M        | Uniform  | 78.34             | 26.46          | 0.3378 |
| 72 |               |                 | ResNet152            | IG65M           | Uniform  | 82.20             | 34.29          | 0.4171 |
| 73 |               |                 | ResNet152            | IG65M           | Uniform  | 82.38             | 33.58          | 0.4076 |
| 74 |               |                 | ResNet152            | IG65M           | Uniform  | 80.39             | 34.62          | 0.4307 |

Table 8: Full experiment result for Action Swap Videos. We list three numbers for each of the random seed. Original Accuracy (OAcc) is different from Table 6, 7 since Action Swap uses subset of validation set. We omit SBErr for Same Swap since the background class is as same as foreground class.

| #  | Dataset      | Model Structure | OAcc  | Random Swap         |                     |                     | Far Swap            |                     |                     | Close Swap          |       |       | Same Swap |       |
|----|--------------|-----------------|-------|---------------------|---------------------|---------------------|---------------------|---------------------|---------------------|---------------------|-------|-------|-----------|-------|
|    |              |                 |       | SHAcc               | SBErr               | SHAcc               | SBErr               | SHAcc               | SBErr               | SHAcc               | SBErr | SHAcc | SHAcc     | SHAcc |
| 1  | Normal Scale | TSN             | 71.44 | 10.66, 10.89, 11.28 | 26.85, 26.78, 26.87 | 09.45, 08.70, 09.15 | 31.22, 31.24, 31.86 | 20.14, 19.80, 19.91 | 24.92, 24.97, 25.36 | 55.44, 55.00, 55.55 |       |       |           |       |
| 2  |              | TSN             | 71.69 | 09.59, 09.45, 10.12 | 26.76, 27.60, 26.90 | 08.61, 07.83, 08.15 | 32.62, 32.29, 32.85 | 18.15, 18.29, 18.38 | 25.29, 25.22, 25.87 | 54.34, 53.58, 53.97 |       |       |           |       |
| 3  |              | TSN             | 70.49 | 12.47, 12.15, 12.89 | 21.01, 21.10, 21.26 | 11.35, 10.73, 11.05 | 24.29, 25.06, 25.02 | 20.87, 20.46, 20.83 | 20.88, 20.76, 21.38 | 50.83, 50.13, 50.56 |       |       |           |       |
| 4  |              | TSN             | 72.55 | 11.17, 11.53, 11.31 | 28.40, 28.66, 28.79 | 10.37, 10.10, 09.80 | 32.92, 32.77, 33.58 | 21.72, 21.26, 21.43 | 26.48, 26.69, 27.19 | 59.14, 58.89, 59.08 |       |       |           |       |
| 5  |              | TSN             | 72.97 | 12.40, 12.64, 12.63 | 25.41, 25.61, 25.63 | 11.24, 10.85, 10.82 | 30.08, 30.44, 30.74 | 21.49, 20.88, 21.51 | 24.19, 24.33, 25.20 | 56.10, 55.83, 55.76 |       |       |           |       |
| 6  |              | TSN             | 73.54 | 13.35, 13.21, 13.32 | 28.20, 28.27, 27.76 | 12.02, 11.72, 11.95 | 32.48, 32.57, 32.94 | 23.69, 23.23, 23.18 | 26.37, 26.73, 27.10 | 59.95, 60.18, 60.49 |       |       |           |       |
| 7  |              | TSN             | 70.93 | 13.69, 13.78, 13.67 | 21.19, 20.88, 21.42 | 12.59, 12.43, 11.88 | 24.37, 24.99, 25.43 | 21.79, 21.77, 22.02 | 21.68, 20.69, 21.51 | 51.91, 51.80, 52.69 |       |       |           |       |
| 8  |              | R(2+1)D         | 70.41 | 13.80, 13.46, 14.21 | 29.36, 30.12, 29.05 | 11.08, 11.12, 10.76 | 34.72, 35.54, 35.86 | 23.46, 23.76, 24.56 | 26.55, 25.89, 26.18 | 61.36, 61.18, 61.39 |       |       |           |       |
| 9  |              | R(2+1)D         | 71.86 | 12.50, 12.68, 12.73 | 29.00, 29.39, 28.98 | 10.09, 10.03, 10.12 | 33.88, 33.56, 34.43 | 22.89, 22.02, 23.25 | 26.69, 26.02, 26.35 | 60.70, 60.77, 61.18 |       |       |           |       |
| 10 |              | R(2+1)D         | 76.19 | 15.81, 15.38, 16.07 | 30.74, 30.62, 29.59 | 12.89, 13.07, 12.96 | 35.75, 35.61, 35.50 | 26.21, 26.85, 26.71 | 27.69, 26.85, 26.73 | 64.64, 64.77, 63.99 |       |       |           |       |
| 11 |              | TIN             | 72.95 | 18.08, 18.27, 18.56 | 21.03, 20.74, 20.71 | 16.52, 16.55, 16.68 | 23.16, 23.39, 23.94 | 27.44, 27.08, 26.89 | 21.24, 20.80, 20.92 | 58.53, 58.73, 58.48 |       |       |           |       |
| 12 |              | TSM             | 70.87 | 13.75, 14.31, 13.96 | 27.74, 27.61, 26.71 | 11.81, 11.79, 11.90 | 32.91, 32.69, 32.39 | 24.68, 24.54, 24.67 | 24.47, 24.95, 25.54 | 61.45, 61.73, 61.64 |       |       |           |       |
| 13 |              | TSM             | 72.22 | 13.91, 13.78, 14.01 | 29.91, 29.91, 29.53 | 11.21, 11.33, 11.06 | 35.23, 35.70, 35.55 | 24.03, 24.40, 24.68 | 27.01, 25.96, 26.23 | 62.33, 61.69, 62.44 |       |       |           |       |
| 14 |              | TSM             | 72.19 | 16.55, 17.26, 17.37 | 20.71, 20.46, 20.74 | 15.70, 15.17, 15.38 | 22.66, 23.73, 23.89 | 26.02, 26.11, 26.02 | 20.99, 20.26, 20.25 | 57.72, 56.70, 56.72 |       |       |           |       |
| 15 |              | TSM             | 72.72 | 16.78, 16.57, 17.39 | 22.02, 21.75, 21.91 | 15.06, 14.85, 15.52 | 24.74, 24.47, 25.20 | 25.80, 26.07, 26.18 | 22.06, 22.27, 21.91 | 58.55, 58.37, 58.14 |       |       |           |       |
| 16 |              | TSM             | 72.89 | 16.46, 16.53, 16.64 | 23.18, 22.54, 22.20 | 14.63, 14.90, 14.70 | 25.50, 26.27, 26.25 | 25.54, 25.47, 26.09 | 22.54, 22.52, 22.66 | 58.46, 58.18, 58.23 |       |       |           |       |
| 17 |              | TSM             | 73.81 | 16.80, 17.39, 17.14 | 23.32, 22.73, 22.87 | 15.72, 15.66, 16.02 | 25.91, 25.96, 26.73 | 26.58, 26.28, 26.82 | 22.52, 22.38, 22.77 | 60.22, 60.42, 59.19 |       |       |           |       |
| 18 |              | TSM             | 72.68 | 16.98, 17.31, 17.55 | 22.62, 22.02, 21.99 | 15.27, 15.31, 15.01 | 25.13, 25.41, 25.86 | 25.71, 26.02, 26.80 | 22.25, 21.88, 21.79 | 58.91, 58.96, 58.34 |       |       |           |       |
| 19 |              | TSM             | 74.84 | 16.41, 16.43, 16.36 | 32.48, 32.00, 31.77 | 13.59, 14.01, 13.44 | 38.70, 38.79, 39.09 | 26.27, 26.64, 26.62 | 28.82, 27.72, 28.40 | 66.10, 65.55, 65.69 |       |       |           |       |
| 20 |              | TSM             | 76.08 | 17.19, 16.73, 17.83 | 34.17, 33.92, 33.00 | 14.69, 14.08, 14.14 | 40.10, 40.33, 40.65 | 27.69, 27.70, 27.93 | 29.23, 28.84, 29.43 | 67.04, 66.08, 66.79 |       |       |           |       |
| 21 |              | TSM             | 74.51 | 17.58, 17.49, 18.03 | 27.85, 27.03, 26.58 | 16.11, 15.56, 15.81 | 31.29, 32.21, 32.52 | 27.05, 26.64, 26.89 | 24.97, 24.83, 25.34 | 62.30, 62.12, 61.71 |       |       |           |       |
| 22 |              | TSM             | 75.35 | 18.04, 17.46, 18.70 | 29.02, 28.75, 28.65 | 15.66, 15.54, 15.98 | 33.60, 33.44, 34.10 | 27.51, 27.58, 27.79 | 25.75, 25.68, 26.11 | 64.50, 64.29, 63.65 |       |       |           |       |
| 23 |              | TSM             | 75.49 | 17.74, 17.97, 18.90 | 29.41, 29.27, 28.73 | 15.86, 15.86, 15.79 | 33.92, 34.79, 35.11 | 28.11, 28.09, 28.34 | 26.69, 25.73, 26.57 | 65.37, 64.43, 63.97 |       |       |           |       |
| 24 |              | I3D             | 75.58 | 17.07, 16.84, 17.21 | 29.94, 29.99, 29.68 | 15.43, 14.35, 14.65 | 34.35, 35.52, 34.63 | 27.31, 27.83, 27.05 | 26.23, 26.37, 27.26 | 64.84, 64.36, 65.37 |       |       |           |       |
| 25 |              | I3D             | 75.33 | 17.17, 16.76, 17.23 | 31.81, 32.20, 31.33 | 14.81, 14.08, 14.37 | 37.36, 37.61, 37.31 | 27.61, 27.67, 27.65 | 28.34, 28.18, 28.33 | 66.86, 66.47, 66.63 |       |       |           |       |
| 26 |              | I3D             | 75.05 | 17.08, 16.52, 16.94 | 32.52, 32.23, 31.68 | 14.42, 14.22, 14.10 | 38.11, 37.68, 38.13 | 27.83, 27.97, 27.54 | 28.79, 28.17, 28.89 | 67.55, 67.22, 67.59 |       |       |           |       |
| 27 |              | I3D             | 75.26 | 17.30, 17.03, 17.60 | 32.73, 32.23, 31.93 | 15.08, 14.38, 14.54 | 38.43, 39.02, 39.12 | 28.15, 28.45, 28.20 | 29.09, 27.95, 28.40 | 67.41, 67.63, 68.09 |       |       |           |       |
| 28 |              | NL-TSM          | 74.06 | 16.30, 16.60, 16.71 | 22.04, 21.51, 21.77 | 15.11, 14.65, 15.31 | 24.84, 25.18, 24.97 | 25.54, 25.40, 26.66 | 21.74, 22.04, 21.45 | 58.52, 59.12, 58.09 |       |       |           |       |
| 29 |              | NL-TSM          | 72.61 | 17.60, 17.42, 17.55 | 20.03, 20.17, 20.01 | 16.04, 15.97, 16.14 | 22.66, 22.78, 23.12 | 25.59, 25.80, 26.89 | 21.10, 21.31, 20.67 | 57.15, 57.38, 56.76 |       |       |           |       |
| 30 |              | NL-TSM          | 73.52 | 17.00, 17.71, 17.12 | 21.03, 21.12, 20.60 | 15.56, 15.13, 16.14 | 23.32, 23.35, 24.28 | 26.14, 26.30, 26.53 | 21.20, 21.35, 21.43 | 58.23, 58.02, 57.40 |       |       |           |       |
| 31 |              | NL-I3D          | 76.90 | 16.16, 16.00, 16.52 | 30.47, 30.12, 29.53 | 13.69, 13.55, 13.07 | 35.14, 35.96, 35.82 | 27.01, 27.15, 26.78 | 26.67, 26.43, 26.60 | 64.43, 65.30, 65.07 |       |       |           |       |
| 32 |              | NL-I3D          | 75.96 | 16.92, 16.98, 17.76 | 31.59, 30.83, 30.40 | 14.88, 13.77, 14.62 | 36.58, 36.74, 36.42 | 27.86, 28.11, 27.70 | 27.51, 27.49, 27.40 | 66.38, 66.84, 66.38 |       |       |           |       |
| 33 |              | NL-I3D          | 76.17 | 15.25, 15.61, 16.02 | 30.67, 29.68, 30.07 | 12.96, 12.70, 12.72 | 35.84, 35.73, 35.22 | 26.66, 26.73, 26.60 | 27.03, 26.35, 27.12 | 64.41, 64.80, 64.55 |       |       |           |       |
| 34 |              | NL-SlowOnly     | 76.10 | 15.04, 15.27, 16.05 | 30.33, 30.53, 29.76 | 13.39, 12.82, 12.77 | 35.25, 36.16, 36.33 | 25.77, 25.47, 26.03 | 26.96, 27.03, 27.24 | 64.45, 64.68, 63.97 |       |       |           |       |
| 35 |              | NL-SlowOnly     | 77.74 | 17.42, 17.39, 17.81 | 28.66, 29.02, 27.76 | 15.54, 14.42, 14.56 | 33.56, 34.13, 34.43 | 27.10, 27.15, 26.78 | 25.86, 25.20, 25.68 | 63.77, 63.68, 63.97 |       |       |           |       |
| 36 |              | CSN             | 75.51 | 17.76, 18.13, 17.74 | 31.66, 31.74, 31.34 | 15.43, 14.99, 15.29 | 36.97, 36.62, 37.70 | 27.92, 28.47, 28.17 | 28.25, 27.19, 27.28 | 65.76, 65.73, 66.33 |       |       |           |       |
| 37 |              | CSN             | 78.08 | 19.39, 19.46, 19.66 | 30.56, 31.08, 30.63 | 16.39, 16.43, 16.59 | 36.49, 36.81, 36.21 | 29.76, 29.60, 29.07 | 27.72, 27.24, 26.90 | 66.79, 66.79, 67.43 |       |       |           |       |
| 38 |              | CSN             | 79.26 | 20.05, 19.98, 21.08 | 30.26, 30.42, 29.64 | 17.39, 17.44, 18.04 | 35.23, 35.29, 35.20 | 30.62, 31.08, 30.78 | 26.53, 25.87, 26.55 | 67.29, 68.26, 67.86 |       |       |           |       |
| 39 |              | TPN             | 76.04 | 17.55, 17.95, 18.58 | 32.43, 31.89, 31.08 | 15.11, 14.79, 14.79 | 37.65, 38.43, 38.38 | 28.86, 28.73, 28.98 | 27.70, 27.69, 27.92 | 67.77, 67.45, 67.39 |       |       |           |       |
| 40 |              | TPN             | 78.63 | 18.84, 18.49, 19.04 | 33.48, 33.62, 32.53 | 16.11, 15.66, 15.75 | 38.38, 39.41, 38.93 | 28.77, 29.37, 28.96 | 29.53, 28.13, 29.48 | 69.54, 69.21, 69.22 |       |       |           |       |
| 41 |              | X3D             | 74.76 | 13.66, 13.73, 14.30 | 26.69, 27.49, 25.82 | 10.90, 11.03, 10.97 | 32.04, 31.63, 32.27 | 24.37, 24.26, 23.97 | 25.00, 24.77, 24.37 | 60.42, 61.13, 60.91 |       |       |           |       |
| 42 |              | X3D             | 77.34 | 15.52, 15.47, 15.86 | 27.38, 27.24, 27.33 | 12.84, 12.84, 12.86 | 31.98, 33.17, 33.17 | 27.08, 26.16, 26.12 | 25.64, 25.29, 25.45 | 63.88, 64.71, 64.38 |       |       |           |       |
| 43 |              | TANet           | 78.35 | 18.27, 17.92, 18.59 | 30.85, 30.74, 29.87 | 15.40, 15.41, 15.61 | 36.46, 36.17, 37.13 | 28.31, 28.84, 28.43 | 27.33, 26.64, 27.06 | 66.83, 67.04, 67.47 |       |       |           |       |
| 44 |              | SlowOnly        | 74.80 | 15.11, 15.88, 15.72 | 33.72, 33.12, 32.27 | 13.00, 12.63, 12.63 | 38.63, 39.48, 39.67 | 25.98, 26.09, 27.01 | 28.79, 29.30, 28.63 | 66.58, 66.28, 66.44 |       |       |           |       |
| 45 |              | SlowOnly        | 76.73 | 16.28, 15.98, 16.82 | 33.85, 33.49, 32.55 | 13.71, 13.80, 13.59 | 38.93, 39.50, 39.58 | 26.98, 26.89, 26.78 | 28.77, 29.44, 29.28 | 66.90, 66.26, 66.67 |       |       |           |       |
| 46 |              | SlowOnly        | 75.28 | 14.44, 14.51, 15.31 | 33.88, 33.33, 32.61 | 12.29, 11.77, 12.00 | 39.53, 39.80, 40.15 | 25.61, 24.88, 25.45 | 29.02, 28.22, 28.56 | 65.02, 64.50, 65.07 |       |       |           |       |
| 47 |              | SlowOnly        | 75.18 | 15.82, 16.18, 16.36 | 31.88, 32.37, 30.23 | 13.19, 13.09, 13.48 | 37.24, 37.68, 38.13 | 27.14, 26.57, 26.71 | 27.70, 27.58, 27.83 | 65.49, 65.53, 65.37 |       |       |           |       |
| 48 |              | SlowOnly        | 75.87 | 15.04, 15.45, 15.65 | 33.37, 32.98, 31.84 | 13.19, 12.75, 12.40 | 38.29, 39.09, 39.30 | 25.87, 25.71, 26.02 | 28.98, 28.77, 29.18 | 66.61, 66.06, 66.33 |       |       |           |       |
| 49 |              | SlowOnly        | 77.85 | 17.19, 17.67, 17.63 | 33.37, 33.03, 32.13 | 15.27, 14.47, 14.69 | 38.32, 38.79, 39.32 | 27.65, 28.04, 28.70 | 29.05, 28.70, 28.45 | 68.32, 68.02, 68.19 |       |       |           |       |
| 50 |              | SlowOnly        | 78.27 | 19.78, 19.37, 20.10 | 31.79, 31.33, 30.30 | 17.23, 16.94, 16.78 | 36.96, 36.49, 37.40 | 31.06, 31.06, 30.90 | 28.08, 27.63, 28.45 | 69.28, 69.92, 69.01 |       |       |           |       |
| 51 |              | SlowFast        | 76.99 | 16.50, 16.27, 17.10 | 34.10, 33.81, 32.73 | 13.51, 13.59, 13.27 | 40.29, 39.78, 40.17 | 27.21, 27.60, 27.40 | 29.30, 29.28, 29.27 | 67.18, 67.50, 67.11 |       |       |           |       |
| 52 |              | SlowFast        | 78.21 | 16.84, 16.87, 18.36 | 34.68, 33.95, 33.40 | 14.62, 14.37, 14.21 | 40.12, 40.60, 40.63 | 28.77, 28.66, 28.52 | 29.12, 29.46, 29.11 | 68.30, 67.77, 68.03 |       |       |           |       |
| 53 |              | SlowFast        | 78.25 | 17.30, 17.39, 18.08 | 34.83, 34.68, 33.64 | 14.72, 14.60, 14.70 | 40.72, 40.85, 40.72 | 28.45, 28.79, 28.43 | 30.72, 30.39, 30.12 | 69.03, 68.90, 68.82 |       |       |           |       |
| 54 |              | SlowFast        | 78.60 | 17.85, 17.24, 18.56 | 33.81, 33.85, 32.82 | 14.95, 14.97, 14.97 | 39.23, 39.53, 39.73 | 29.12, 28.68, 28.43 | 29.62, 29.11, 29.37 | 67.06, 67.95, 67.96 |       |       |           |       |



## References

- [1] Gedas Bertasius, Heng Wang, and Lorenzo Torresani. Is space-time attention all you need for video understanding? In *ICML*, 2021.
- [2] J. Carreira and Andrew Zisserman. Quo vadis, action recognition? a new model and the kinetics dataset. In *CVPR*, 2017.
- [3] Ho Kei Cheng, Jihoon Chung, Yu-Wing Tai, and Chi-Keung Tang. Cascadepsp: Toward class-agnostic and very high-resolution segmentation via global and local refinement. In *CVPR*, 2020.
- [4] Myung Jin Choi, Antonio Torralba, and Alan S. Willsky. Context models and out-of-context objects. *Pattern Recognition Letters*, 2012.
- [5] Jihoon Chung, Cheng hsin Wu, Hsuan ru Yang, Yu-Wing Tai, and Chi-Keung Tang. Haa500: Human-centric atomic action dataset with curated videos. In *ICCV*, 2021.
- [6] Jia Deng, Wei Dong, Richard Socher, Li-Jia Li, Kai Li, and Li Fei-Fei. Imagenet: A large-scale hierarchical image database. In *CVPR*, 2009.
- [7] Haodong Duan, Yue Zhao, Yuanjun Xiong, Wentao Liu, and Dahua Lin. Omni-sourced webly-supervised learning for video recognition. In *ECCV*, 2020.
- [8] Bernard Ghanem Fabian Caba Heilbron, Victor Escorcia and Juan Carlos Nieves. Activitynet: A large-scale video benchmark for human activity understanding. In *CVPR*, 2015.
- [9] Christoph Feichtenhofer. X3d: Expanding architectures for efficient video recognition. In *CVPR*, 2020.
- [10] Christoph Feichtenhofer, Haoqi Fan, Jitendra Malik, and Kaiming He. Slowfast networks for video recognition. In *ICCV*, 2019.
- [11] Robert Geirhos, Jörn-Henrik Jacobsen, Claudio Michaelis, Richard Zemel, Wieland Brendel, Matthias Bethge, and Felix A Wichmann. Shortcut learning in deep neural networks. *Nature Machine Intelligence*, 2020.
- [12] Robert Geirhos, Patricia Rubisch, Claudio Michaelis, Matthias Bethge, Felix A Wichmann, and Wieland Brendel. Imagenet-trained cnns are biased towards texture; increasing shape bias improves accuracy and robustness. *arXiv*, 2018.
- [13] Deepti Ghadiyaram, Du Tran, and Dhruv Mahajan. Large-scale weakly-supervised pre-training for video action recognition. In *CVPR*, 2019.
- [14] Kaiming He, Xiangyu Zhang, Shaoqing Ren, and Jian Sun. Deep residual learning for image recognition. In *CVPR*, 2016.
- [15] Yun He, Soma Shirakabe, Yutaka Satoh, and Hirokatsu Kataoka. Human action recognition without human. In *ECCV Workshops*, 2016.
- [16] Jitesh Jain, Anukriti Singh, Nikita Orlov, Zilong Huang, Jiachen Li, Steven Walton, and Humphrey Shi. Semask: Semantically masking transformer backbones for effective semantic segmentation. *arXiv*, 2021.
- [17] Dahun Kim, Sanghyun Woo, Joon-Young Lee, and In So Kweon. Deep video inpainting. In *CVPR*, 2019.
- [18] Zhen Li, Cheng-Ze Lu, Jianhua Qin, Chun-Le Guo, and Ming-Ming Cheng. Towards an end-to-end framework for flow-guided video inpainting. In *CVPR*, 2022.
- [19] Ji Lin, Chuang Gan, and Song Han. Tsm: Temporal shift module for efficient video understanding. In *ICCV*, 2019.
- [20] Zhaoyang Liu, Limin Wang, Wayne Wu, Chen Qian, and Tong Lu. Tam: Temporal adaptive module for video recognition. In *ICCV*, 2021.
- [21] Jiaxu Miao, Yunchao Wei, Yu Wu, Chen Liang, Guangrui Li, and Yi Yang. Vspw: A large-scale dataset for video scene parsing in the wild. In *CVPR*, 2021.
- [22] Aude Oliva and Antonio Torralba. The role of context in object recognition. *Trends in Cognitive Sciences*, 2007.
- [23] Mark Sandler, Andrew Howard, Menglong Zhu, Andrey Zhmoginov, and Liang-Chieh Chen. Mobilenetv2: Inverted residuals and linear bottlenecks. In *CVPR*, 2018.
- [24] Dian Shao, Yue Zhao, Bo Dai, and Dahua Lin. Finegym: A hierarchical video dataset for fine-grained action understanding. In *CVPR*, 2020.
- [25] Hao Shao, Shengju Qian, and Yu Liu. Temporal interlacing network. In *AAAI*, 2020.
- [26] Khurram Soomro, Amir Roshan Zamir, and Mubarak Shah. Ucf101: A dataset of 101 human actions classes from videos in the wild. *arXiv*, 2012.
- [27] Du Tran, Heng Wang, Lorenzo Torresani, Jamie Ray, Yann LeCun, and Manohar Paluri. A closer look at spatiotemporal convolutions for action recognition. In *CVPR*, 2018.
- [28] Heng Wang, Matt Feiszli, and Lorenzo Torresani. Video classification with channel-separated convolutional networks. In *ICCV*, 2019.
- [29] Limin Wang, Yuanjun Xiong, Zhe Wang, Yu Qiao, Dahua Lin, Xiaoou Tang, and Luc Van Gool. Temporal segment networks: Towards good practices for deep action recognition. In *ECCV*, 2016.
- [30] Xiaolong Wang, Ross Girshick, Abhinav Gupta, and Kaiming He. Non-local neural networks. In *CVPR*, 2018.

- [31] Kai Xiao, Logan Engstrom, Andrew Ilyas, and Aleksander Madry. Noise or signal: The role of image backgrounds in object recognition. *ICLR*, 2021.
- [32] I Zeki Yalniz, Hervé Jégou, Kan Chen, Manohar Paluri, and Dhruv Mahajan. Billion-scale semi-supervised learning for image classification. *arXiv*, 2019.
- [33] Ceyuan Yang, Yinghao Xu, Jianping Shi, Bo Dai, and Bolei Zhou. Temporal pyramid network for action recognition. In *CVPR*, 2020.
- [34] Yuhui Yuan, Xilin Chen, and Jingdong Wang. Object-contextual representations for semantic segmentation. In *ECCV*, 2020.
- [35] Jianguo Zhang, Marcin Marszałek, Svetlana Lazebnik, and Cordelia Schmid. Local features and kernels for classification of texture and object categories: A comprehensive study. *IJCV*, 2007.
- [36] Hengshuang Zhao, Jianping Shi, Xiaojuan Qi, Xiaogang Wang, and Jiaya Jia. Pyramid scene parsing network. In *CVPR*, 2017.
